# Supplementary material for: Bioinformatics Analysis of Bacterial Annexins – Putative Ancestral Relatives of Eukaryotic Annexins
Source: PubMed Central journal article supplement (PMC3894181; doi:10.1371/journal.pone.0085428), 2014-01-16
Supplement: pone.0085428.s002.pdf [file pone.0085428.s002.pdf]

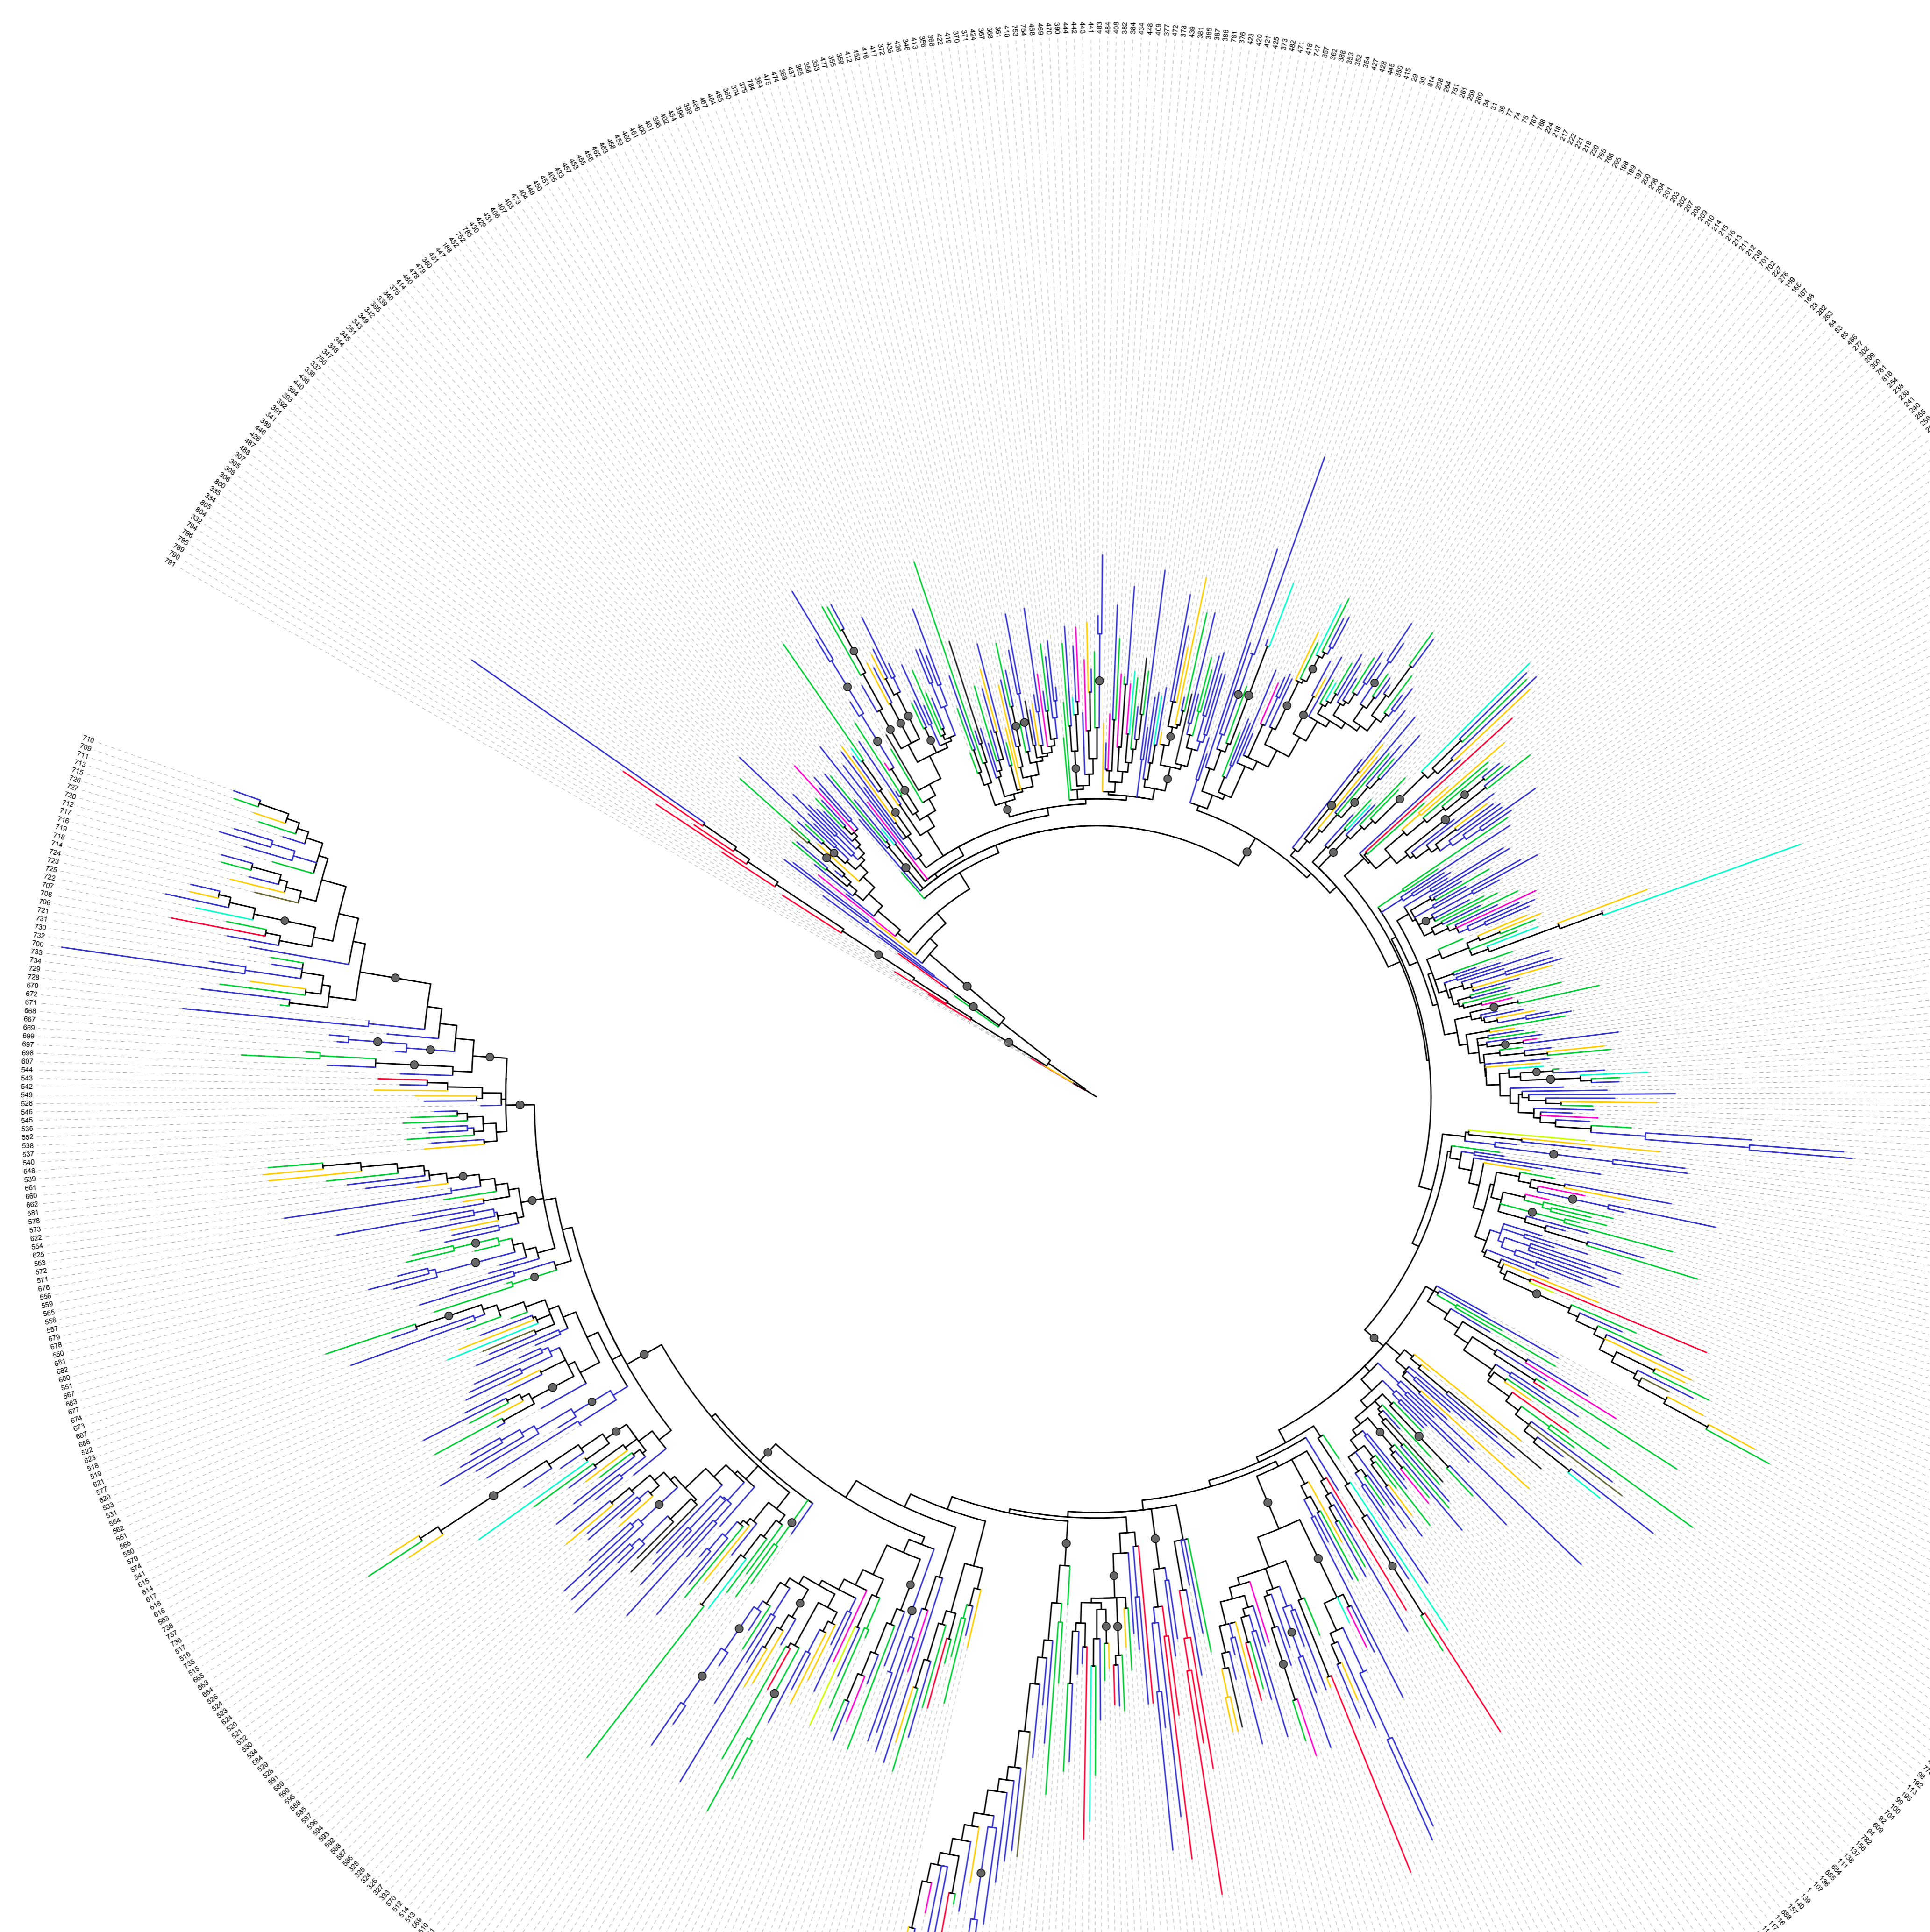

310  
709  
711  
715  
726  
727  
730  
712  
716  
718  
714  
724  
725  
722  
727  
708  
706  
721  
730  
730  
730  
734  
729  
870  
871  
868  
867  
869  
899  
898  
807  
844  
843  
842  
849  
838  
846  
845  
835  
852  
838  
837  
840  
839  
848  
865  
861  
860  
862  
881  
878  
873  
852  
854  
855  
853  
872  
871  
878  
856  
859  
858  
855  
857  
879  
878  
850  
881  
882  
851  
867  
863  
874  
886  
882  
878  
875  
876  
877  
879  
880  
881  
882  
883  
884  
885  
886  
887  
888  
889  
890  
891  
892  
893  
894  
895  
896  
897  
898  
899  
900  
901  
902  
903  
904  
905  
906  
907  
908  
909  
910  
911  
912  
913  
914  
915  
916  
917  
918  
919  
920  
921  
922  
923  
924  
925  
926  
927  
928  
929  
930  
931  
932  
933  
934  
935  
936  
937  
938  
939  
940  
941  
942  
943  
944  
945  
946  
947  
948  
949  
950  
951  
952  
953  
954  
955  
956  
957  
958  
959  
960  
961  
962  
963  
964  
965  
966  
967  
968  
969  
970  
971  
972  
973  
974  
975  
976  
977  
978  
979  
980  
981  
982  
983  
984  
985  
986  
987  
988  
989  
990  
991  
992  
993  
994  
995  
996  
997  
998  
999  
1000

1  
8  
81  
291  
21  
22  
25  
51  
52  
27  
47  
266  
59  
62  
24  
63  
64  
88  
90  
87  
78  
301  
81  
73  
60  
13  
15  
14  
16  
745  
812  
782  
783  
807  
504  
505  
506  
85  
101  
226  
610  
129  
126  
164  
165  
179  
743  
173  
174  
172  
175  
170  
171  
178  
177  
176  
889  
127  
128  
130  
131  
132  
133  
134  
135  
136  
137  
138  
139  
140  
141  
142  
143  
144  
145  
146  
147  
148  
149  
150  
151  
152  
153  
154  
155  
156  
157  
158  
159  
160  
161  
162  
163  
164  
165  
166  
167  
168  
169  
170  
171  
172  
173  
174  
175  
176  
177  
178  
179  
180  
181  
182  
183  
184  
185  
186  
187  
188  
189  
190  
191  
192  
193  
194  
195  
196  
197  
198  
199  
200  
201  
202  
203  
204  
205  
206  
207  
208  
209  
210  
211  
212  
213  
214  
215  
216  
217  
218  
219  
220  
221  
222  
223  
224  
225  
226  
227  
228  
229  
230  
231  
232  
233  
234  
235  
236  
237  
238  
239  
240  
241  
242  
243  
244  
245  
246  
247  
248  
249  
250  
251  
252  
253  
254  
255  
256  
257  
258  
259  
260  
261  
262  
263  
264  
265  
266  
267  
268  
269  
270  
271  
272  
273  
274  
275  
276  
277  
278  
279  
280  
281  
282  
283  
284  
285  
286  
287  
288  
289  
290  
291  
292  
293  
294  
295  
296  
297  
298  
299  
300  
301  
302  
303  
304  
305  
306  
307  
308  
309  
310

|    |                                   |     |                                    |
|----|-----------------------------------|-----|------------------------------------|
| 1  | Amoebozoa_F0YFB9_AURAN/158-223    | 401 | Metazoa_Q6DKC4_ENLA/110-175        |
| 2  | fungi_A1C4F1_ASPCL/231-296        | 402 | Metazoa_H3BCF7_LATCH/91-156        |
| 3  | plant_A5AJ78_VITVI/169-235        | 403 | Metazoa_A5LHA5_LITCT/250-315       |
| 4  | plant_A9RZF7_PHYPA/169-235        | 404 | Stramenopiles_G4Z1N4_PHYSP/272-336 |
| 5  | plant_A5BTZ8_VITVI/163-228        | 405 | plant_B9HVR2_POPTR/170-236         |
| 6  | plant_E0ZCA8_PICSI/63-126         | 406 | fungi_F7W8H2_SORMK/327-394         |
| 7  | Metazoa_H2NOL3_ORYLA/7-72         | 407 | Metazoa_C1BIH9_OSMMO/89-154        |
| 8  | Metazoa_Q5U369_DANRE/269-334      | 408 | fungi_E7A392_SPORE/127-191         |
| 9  | Metazoa_F6T207_ORNAN/118-183      | 409 | Stramenopiles_H3H2V8_PHYRM/97-163  |
| 11 | Metazoa_Q6GNT0_ENLA/253-318       | 410 | plant_D3GC08_9ROSI/14-79           |
| 12 | fungi_A1DHU3_NEOF/301-367         | 412 | fungi_B6GYL8_PENCW/333-388         |
| 13 | Metazoa_C1BW6_ESOLU/193-259       | 413 | Metazoa_G4VI63_SCHMA/343-409       |
| 14 | Stramenopiles_B8CCQ1_THAPS/96-161 | 414 | Metazoa_E0VHI3_PEDHC/70-135        |
| 15 | Metazoa_A6RL81_BOTFB/388-444      | 415 | Metazoa_Q7QG24_ANOGA/252-317       |
| 16 | Metazoa_G1KMZ9_ANOCA/171-237      | 416 | plant_E5GCK3_CUCME/87-152          |
| 17 | plant_F2E4W7_HORVD/15-75          | 417 | Metazoa_G6D7C8_DANPL/176-241       |
| 18 | Metazoa_G3WNV2_SARHA/20-85        | 418 | fungi_H1VE74_COLHI/316-381         |
| 19 | Metazoa_F6UBG2_CALJA/196-264      | 419 | Stramenopiles_B5Y5D2_PHATC/262-324 |
| 20 | plant_A5B479_VITVI/245-310        | 420 | Metazoa_E9J8L4_SOLIN/97-162        |
| 21 | Metazoa_A7T6G0_NEMVE/1-57         | 421 | Other_O_A9V2E0_MONBE/829-895       |
| 22 | plant_C1E164_MICSR/438-503        | 422 | Metazoa_D6WZQ2_TRICA/164-229       |
| 23 | Metazoa_G3N8C5_GASAC/269-334      | 423 | Metazoa_F1L2C7_ASCSU/92-157        |
| 24 | Other_O_F2UJT2_SALS5/272-337      | 424 | Metazoa_C1BK84_OSMMO/37-102        |
| 25 | Metazoa_A8NZK8_BRUMA/155-207      | 425 | Metazoa_G0MCK6_CAEBE/248-313       |
| 26 | Metazoa_C3ZV5_BRAFL/820-872       | 426 | fungi_Q0CEU8_ASPTN/288-354         |
| 27 | plant_B9GM28_POPTR/15-80          | 427 | plant_Q9ZR53_MEDSA/87-151          |
| 28 | Metazoa_H3EJ11_PRIPA/81-142       | 428 | Metazoa_G5EEA8_CAEEL/248-313       |
| 29 | Metazoa_E1GHD6_LOALO/1-55         | 429 | Other_O_A9UP20_MONBE/252-317       |
| 30 | Metazoa_F4W699_ACREC/97-162       | 430 | Metazoa_H3B470_LATCH/256-321       |
| 31 | Metazoa_E9G1C8_DAPPU/27-92        | 431 | plant_B9I4U4_POPTR/89-152          |
| 32 | plant_I1I762_BRADI/15-77          | 432 | Metazoa_D6WZQ1_TRICA/83-148        |
| 33 | Metazoa_E1GHD6_LOALO/73-139       | 433 | Amoebozoa_ANA7_DICDI/319-386       |
| 34 | plant_P93158_GOSHI/13-79          | 434 | Metazoa_Q5DH15_SCHJA/195-262       |
| 35 | Stramenopiles_B8CCQ1_THAPS/23-89  | 435 | Metazoa_Q17A50_AEDAE/93-158        |
| 36 | Metazoa_C1BMC5_OSMMO/173-239      | 436 | Metazoa_Q5D8M0_SCHJA/102-168       |
| 37 | Metazoa_C1BZS7_ESOLU/94-159       | 437 | plant_I1HJW8_BRADI/225-289         |
| 38 | Metazoa_B4L73_DROMO/19-84         | 438 | fungi_A2QCQ7_ASPNC/148-213         |
| 39 | plant_B3TLY9_ELAGV/170-235        | 439 | Other_O_A9VC1_MONBE/664-730        |
| 40 | plant_B4FJC1_MAIZE/170-240        | 440 | plant_A5B7L0_VITVI/176-221         |
| 41 | Other_O_E9C3C5_CAPO3/984-1050     | 441 | plant_I1JWG5_SOYBN/221-286         |
| 42 | Metazoa_B51W5_SALSA/408-474       | 442 | fungi_B2VUR2_PYRTR/397-464         |
| 43 | Metazoa_H2LY47_ORYLA/111-176      | 443 | Metazoa_F6WI47_ORNAN/91-156        |
| 44 | Metazoa_H0YRC2_TAEGU/358-423      | 444 | Stramenopiles_DONJ65_PHYIT/184-250 |
| 45 | Metazoa_A2BHN0_DANRE/111-176      | 445 | Metazoa_F6T207_ORNAN/277-342       |
| 46 | Metazoa_A7SW86_NEMVE/184-250      | 446 | Stramenopiles_F0WGW3_9STRA/514-580 |
| 47 | fungi_F7W8H2_SORMK/405-471        | 447 | Stramenopiles_DONUM8_PHYIT/183-249 |
| 48 | Metazoa_E2RCI8_CANFA/254-319      | 448 | plant_G1ETN3_NELNU/244-309         |
| 49 | Metazoa_Q803A1_DANRE/89-154       | 449 | Metazoa_G5DZW5_9PIPI/170-236       |
| 50 | plant_B9ISV5_POPTR/248-314        | 450 | Metazoa_G1Q8S6_MYOLU/402-450       |
| 51 | Stramenopiles_G4Z1N4_PHYSP/25-91  | 451 | Metazoa_G1P7U7_MYOLU/60-126        |
| 52 | Metazoa_G4VI66_SCHMA/401-467      | 452 | Metazoa_B7QCG4_IOSCI/101-146       |
| 53 | Metazoa_C1BZR8_ESOLU/20-85        | 453 | plant_A5B479_VITVI/87-152          |
| 54 | Metazoa_G1MU27_MELGA/16-82        | 454 | plant_A9TFB3_PHYPA/245-310         |
| 57 | Metazoa_Q7ZW0_ENLA/266-331        | 455 | plant_AND7_ARATH/245-310           |
| 58 | Metazoa_H3FTB2_PRIPA/227-281      | 456 | Metazoa_F7HMN3_CALJA/21-80         |
| 59 | Metazoa_F6W0Q1_MONDO/245-310      | 457 | Metazoa_D6WZQ1_TRICA/777-842       |
| 60 | plant_O82090_GOSHI/170-235        | 458 | fungi_B8M4F7_TALSN/405-470         |
| 61 | Metazoa_E1BW1_CHICK/437-502       | 459 | Metazoa_F7BN50_ENTR/178-244        |
| 62 | fungi_G9NH54_HYPAI/148-213        | 460 | Metazoa_E3MY10_CAERE/102-167       |
| 63 | plants_D8LG01_ECTSI/443-507       | 461 | Metazoa_H3B3V1_LATCH/202-268       |
| 64 | Metazoa_Q3US43_MOUSE/46-111       | 462 | fungi_C5FNC5_ARTOC/403-470         |
| 65 | Metazoa_A5LHA3_LITCT/270-335      | 463 | Metazoa_H3CR25_TETNG/18-83         |
| 66 | fungi_F0PB2_GROCL/165-230         | 464 | Metazoa_E3MY10_CAERE/32-95         |
| 67 | Metazoa_ANA5_CHICK/174-240        | 465 | Metazoa_Q6P603_DANRE/107-172       |
| 68 | plant_C0PQS6_PICSI/171-228        | 466 | Metazoa_B4M9Y2_DROVI/251-316       |
| 70 | plant_B9HVR2_POPTR/87-152         | 467 | Metazoa_COHA2_SALSA/301-366        |
| 72 | plant_D2D2Z9_GOSHI/86-151         | 468 | Other_O_A9VD41_MONBE/154-190       |
| 73 | fungi_C0ND81_AJECG/181-246        | 469 | Metazoa_E39D4_ANODA/102-167        |

|     |                                    |     |                                     |
|-----|------------------------------------|-----|-------------------------------------|
| 74  | Metazoa_C3ZI54_BRAFL/47-92         | 470 | Stramenopiles_Q0ZNW4_SAPMO/259-323  |
| 75  | Stramenopiles_G5AHT5_PHYSP/899-965 | 471 | Metazoa_E1GLF4_LOALO/38-103         |
| 77  | Metazoa_H3HWP9_STRPU/160-225       | 472 | Metazoa_Q4W6D6_9METZ/176-242        |
| 78  | Metazoa_H2S105_TAKRU/275-340       | 473 | plants_D8LG01_ECTSI/96-162          |
| 79  | plant_C5NL1_SORBI/252-319          | 474 | Metazoa_Q4T4Q3_TETNG/240-305        |
| 80  | Metazoa_G3VWR3_SARHA/89-154        | 475 | Amoebozoa_Q54PW0_DICDI/335-395      |
| 81  | plant_AN4_FRAAN/169-234            | 477 | Metazoa_B7QCG4_IOSC/29-94           |
| 82  | Metazoa_E1FYF7_LOALO/253-318       | 478 | plant_D6Q29_SOYBN/298-365           |
| 83  | plant_B7U9S0_CARAS/185-250         | 479 | Metazoa_Q4SJ99_TETNG/224-289        |
| 84  | Metazoa_G3WNV2_SARHA/251-316       | 480 | Metazoa_G3H29_CRIGR/242-307         |
| 85  | plant_I1LLB8_SOYBN/274-330         | 481 | Metazoa_F1N650_BOVIN/46-111         |
| 86  | fungi_H1VDA4_COLHI/658-694         | 482 | Metazoa_E1G226_LOALO/185-250        |
| 87  | Metazoa_G3PY92_GASAC/254-319       | 483 | Metazoa_G2HJV7_PANTR/167-232        |
| 88  | plant_A2YVD9_ORYSI/171-237         | 484 | Metazoa_G7P536_MACFA/253-318        |
| 89  | Other_O_F2UBR9_SALS5/86-152        | 485 | plant_A9RBN7_PHYPA/86-155           |
| 90  | Metazoa_H2RYZ9_TAKRU/47-112        | 486 | Other_O_E9C3C5_CAPO3/615-681        |
| 91  | Metazoa_Q640T3_ENTR/93-158         | 487 | Metazoa_F6YVM0_MONDO/45-110         |
| 92  | Metazoa_A3KN40_BOVIN/97-163        | 488 | Metazoa_H2URI3_TAKRU/248-313        |
| 93  | Metazoa_A7T6G0_NEMVE/64-129        | 489 | plant_A2YAT3_ORYSI/15-80            |
| 94  | Metazoa_D5KU33_BOMM/270-335        | 490 | plant_C6TK93_SOYBN/15-80            |
| 95  | plant_A5AJ78_VITVI/241-308         | 491 | Metazoa_E9G1C8_DAPPU/99-164         |
| 96  | Metazoa_G3Q341_GASAC/248-313       | 492 | Metazoa_G3PCE2_GASAC/38-103         |
| 98  | fungi_A6R2M2_AJECN/413-480         | 494 | Metazoa_ANA1_RAT/118-183            |
| 99  | Metazoa_G5BQN3_HETGA/192-258       | 495 | Ecavates_E2RTS4_GIAIC/226-283       |
| 100 | Metazoa_D3ZSA0_RAT/117-182         | 496 | Metazoa_A2BHN0_DANRE/270-335        |
| 101 | Metazoa_Q66KY7_ENLA/135-200        | 498 | Metazoa_Q5U362_RAT/18-83            |
| 102 | Metazoa_H2VQB3_CAEJA/266-331       | 499 | Other_O_F2UPY8_SALS5/412-478        |
| 104 | Metazoa_B2L3Y3_ENBO/1-28           | 500 | plant_Q8W4Z7_GOSHI/57-122           |
| 105 | plant_F6KLJ6_ARAHY/168-235         | 501 | bacteria_Aa_402495696.11            |
| 107 | Metazoa_Q6DKC4_ENLA/269-334        | 502 | Metazoa_H3BDR7_LATCH/192-258        |
| 108 | plant_B9SNI5_RICCO/8-74            | 503 | plant_B9I4U4_POPTR/15-80            |
| 109 | Metazoa_D6WDY4_TRICA/25-90         | 504 | Metazoa_A8KBY8_DANRE/91-156         |
| 110 | plant_B6U6E7_MAIZE/170-227         | 505 | Metazoa_E2ROS6_CANFA/25-90          |
| 111 | plant_A9SPZ1_PHYPA/272-337         | 506 | Metazoa_C3VEV0_SCHMA/195-262        |
| 112 | plant_B4FSS8_MAIZE/174-243         | 507 | human_Q5VTM3_HUMAN/162-200          |
| 113 | Metazoa_F6TPA0_MONDO/165-202       | 508 | fungi_F9QC8_MYCGM/541-590           |
| 114 | fungi_E3QNG4_COLGM/236-301         | 509 | Stramenopiles_G5AHT5_PHYSP/977-1040 |
| 116 | plant_A9NNL2_PICSI/15-80           | 510 | fungi_C1GIN4_PARBD/330-395          |
| 117 | Stramenopiles_D0NJ65_PHYIT/99-164  | 511 | Metazoa_ANA1_BOVIN/118-183          |
| 118 | Metazoa_Q804G4_DANRE/297-362       | 512 | Metazoa_Q4SNZ4_TETNG/83-148         |
| 119 | Metazoa_F6W0Q1_MONDO/14-79         | 513 | Metazoa_Q6Y223_PAGMA/45-111         |
| 120 | fungi_F974_MYCGM/376-442           | 514 | Metazoa_G1KKD7_ANOCA/367-432        |
| 121 | bacteria_Cg_228472152.30           | 515 | Metazoa_E0VHI3_PEDHC/301-350        |
| 122 | Metazoa_F6VNG2_CIOIN/356-423       | 516 | Metazoa_E4VU6_OIKDI/184-250         |
| 123 | Metazoa_B0V2N5_MOUSE/46-107        | 517 | Metazoa_F7A0T0_HORSE/47-112         |
| 124 | Metazoa_A6RW25_BOTFB/235-300       | 518 | plant_A2YAT3_ORYSI/87-154           |
| 125 | plant_D8R2M8_SELML/87-152          | 519 | plant_A5AQM9_VITVI/164-217          |
| 126 | Metazoa_E9H188_DAPPU/188-256       | 520 | plant_A5BLT1_VITVI/169-236          |
| 127 | Metazoa_H2NOL3_ORYLA/164-229       | 521 | Metazoa_E9GWA4_DAPPU/73-137         |
| 128 | Metazoa_G3MG82_9ACAR/15-80         | 522 | Metazoa_H3APK8_LATCH/277-342        |
| 129 | fungi_C1GNP1_PARBA/263-328         | 523 | fungi_G2WZD9_VERDV/305-370          |
| 130 | Metazoa_H2ZUH7_LATCH/177-243       | 524 | Metazoa_F7FNN0_ORNAN/109-174        |
| 131 | plant_A2YVD9_ORYSI/15-80           | 525 | Metazoa_F1QRPO_DANRE/90-155         |
| 132 | Metazoa_G1SKA9_RABIT/39-102        | 526 | Metazoa_ANA8_MOUSE/181-247          |
| 133 | plant_A9SB32_PHYPA/212-279         | 528 | Metazoa_G4VI63_SCHMA/187-252        |
| 134 | Metazoa_B4GM07_DROPE/256-321       | 529 | Metazoa_O93447_ORYLA/362-428        |
| 135 | Metazoa_F6M44_CIOIN/22-90          | 530 | plant_A9SB32_PHYPA/58-114           |
| 136 | plant_B9RGC8_RICCO/244-309         | 531 | Metazoa_B2L3Y8_ENBO/1-27            |
| 137 | Metazoa_F7DNG2_HORSE/117-182       | 532 | fungi_G1WYE9_ARTOA/267-332          |
| 138 | Metazoa_H2RWB9_TAKRU/22-91         | 533 | Ecavates_C6LZB5_GIAIB/86-146        |
| 139 | plant_C6TK93_SOYBN/172-237         | 534 | Metazoa_H9G957_ANOCA/290-356        |
| 140 | Metazoa_Q66ID8_DANRE/39-104        | 535 | plant_A5BTZ8_VITVI/8-73             |
| 141 | Metazoa_H2MEL1_ORYLA/278-343       | 537 | Metazoa_ANA1_RODSP/118-183          |
| 142 | fungi_B2WAQ5_PYRTR/601-654         | 538 | Metazoa_A8ZC3_CAEBR/18-81           |
| 143 | plant_O65848_MEDTR/86-150          | 539 | fungi_Q5KH35_CRYNJ/333-397          |
| 144 | Metazoa_C3ZND4_BRAFL/94-159        | 540 | plant_I1HFK2_BRADI/171-231          |
| 145 | Metazoa_F1C6Z5_PERFV/1-53          | 541 | Metazoa_B5FE8_TAEGU/14-79           |
| 147 | Metazoa_O93446_ORYLA/110-175       | 542 | fungi_C1G8V6_PARBD/420-489          |

|     |                                    |     |                                |
|-----|------------------------------------|-----|--------------------------------|
| 148 | plant_A5B479_VITVI/15-80           | 543 | Metazoa_O93447_ORYLA/279-344   |
| 149 | fungi_B2B343_PODAN/248-312         | 544 | bacteria_FI_392964889.19       |
| 150 | plants_D7FJE4_ECTSI/267-332        | 545 | Metazoa_H2LTW7_ORYLA/266-331   |
| 152 | Metazoa_F6PT14_HORSE/59-124        | 546 | Metazoa_C1C3N0_LITCT/45-110    |
| 153 | plant_G7LF84_MEDTR/86-151          | 548 | Metazoa_E9H189_DAPPU/266-331   |
| 154 | bacteria_Ho_227398614.7            | 549 | fungi_G1WYE9_ARTOA/427-494     |
| 155 | Metazoa_B1B561_SOLSE/162-227       | 550 | plant_D7MT72_ARALL/87-152      |
| 156 | Metazoa_H3IJQ8_STRPU/22-86         | 551 | Metazoa_G3USL9_MELGA/1-43      |
| 157 | plant_E4MEO_THEHA/1-46             | 552 | plant_F2DQP5_HORVD/87-152      |
| 158 | fungi_Q5MAH1_PENCH/48-112          | 553 | plant_A9NMW6_PICSI/171-237     |
| 159 | Metazoa_F67L6_CALJA/214-280        | 554 | Metazoa_Q7QM48_ANOGA/19-84     |
| 160 | Metazoa_B7U3W3_CTEID/92-157        | 555 | fungi_B2B343_PODAN/433-500     |
| 161 | Metazoa_F6WVJ1_ORNAN/248-312       | 556 | Metazoa_F6U5G3_ORNAN/184-250   |
| 162 | Metazoa_B5RI22_SALSA/434-499       | 557 | Metazoa_G4VI62_SCHMA/30-95     |
| 163 | Metazoa_Q6B344_CHICK/253-318       | 558 | Metazoa_B2LU0_SCHBO/110-183    |
| 164 | Metazoa_Q66JF6_ENTR/36-100         | 559 | Metazoa_Q641H0_ENLA/432-497    |
| 165 | fungi_Q5BC4_EMENI/197-262          | 560 | Metazoa_H2SEN2_TAKRU/247-307   |
| 166 | Metazoa_H2ZUH7_LATCH/253-318       | 561 | Metazoa_B5FE8_TAEGU/169-235    |
| 167 | plant_AN4_FRAAN/86-151             | 562 | Metazoa_F6VPS5_MONDO/444-509   |
| 168 | Metazoa_H0ZZ00_TAEGU/95-160        | 563 | Metazoa_HOYUM4_TAEGU/86-151    |
| 169 | plant_C6TNJ9_SOYBN/87-151          | 564 | Metazoa_C4WSW4_ACYPI/22-87     |
| 170 | plant_A4S542_OSTLU/73-140          | 565 | plant_I1IQN4_BRADI/81-149      |
| 171 | plant_B9T8F3_RICCO/1-34            | 566 | Metazoa_H2VK4_CAEJA/19-81      |
| 172 | plant_B6TT93_MAIZE/170-236         | 567 | Metazoa_H9GFN4_ANOCA/22-88     |
| 173 | Stramenopiles_G4RU0_9STRA/1-37     | 569 | plant_Q56D10_TOBAC/247-312     |
| 174 | plant_C54R1_SORBI/181-238          | 570 | Metazoa_H2Y7G3_CIOSA/347-413   |
| 175 | plant_AN4_FRAAN/244-309            | 571 | Metazoa_B51G1_SALSA/90-155     |
| 176 | Metazoa_B3RPM7_TRIAD/173-239       | 572 | fungi_G2Y61_BOTF4/170-235      |
| 177 | Metazoa_G4VI64_SCHMA/200-265       | 573 | Metazoa_F7B9R9_MONDO/87-152    |
| 178 | Metazoa_E1ZYA7_CAMFO/25-90         | 574 | fungi_E5ADB2_LEPMJ/200-265     |
| 179 | Stramenopiles_H3HB96_PHYRM/183-247 | 575 | fungi_Q5B3S2_EMENI/1315-1369   |
| 180 | human_E5RK69_HUMAN/71-113          | 576 | Other_O_F2UCQ3_SALS5/545-610   |
| 182 | Metazoa_H3CF99_TETNG/91-156        | 577 | fungi_F9G7F4_FUSOF/343-407     |
| 183 | fungi_C5FNCS_ARTOC/171-236         | 578 | Metazoa_O93444_ORYLA/20-85     |
| 184 | Metazoa_H2KP47_CLOSI/500-566       | 579 | Metazoa_A4QNM7_ENTR/251-316    |
| 185 | Metazoa_E3TCL0_9TELE/251-316       | 580 | Metazoa_F7B20_ENTR/285-350     |
| 186 | plant_G8E493_ORYSI/85-152          | 581 | plant_Q2TE7_SOLTU/245-310      |
| 187 | Metazoa_F7GDF3_MONDO/248-313       | 582 | plant_B9RGC8_RICCO/86-150      |
| 188 | Metazoa_H2Y7G3_CIOSA/423-488       | 583 | plant_Q6L4C5_ORYSI/136-207     |
| 189 | Metazoa_G1T8F2_RABIT/118-180       | 584 | Metazoa_B2D0I4_ARTSF/330-396   |
| 190 | Metazoa_F1QKN3_DANRE/246-311       | 585 | fungi_A8N3U1_COPC7/356-431     |
| 191 | plant_AND4_ARATH/245-314           | 586 | Amoebozoa_F0YFK0_AURAN/76-141  |
| 192 | Amoebozoa_F0ZZ05_DICPU/67-135      | 587 | Amoebozoa_F4Q2W8_DICFS/480-547 |
| 193 | Metazoa_E9GWB8_DAPPU/33-97         | 588 | Metazoa_G1N2K9_MELGA/229-264   |
| 194 | Metazoa_A7RW1_NEMVE/1-58           | 589 | fungi_G0RCF8_HYPJQ/387-454     |
| 195 | Metazoa_B51G1_SALSA/249-314        | 590 | Metazoa_A0F047_PSEM/114-165    |
| 196 | Metazoa_E1FLW0_LOALO/344-409       | 591 | Metazoa_G3N8C9_GASAC/54-119    |
| 197 | plant_A5B479_VITVI/170-235         | 592 | Metazoa_G6CV8_DANPL/25-90      |
| 198 | plant_A5CB60_VITVI/289-332         | 593 | Metazoa_HOP88_OTOGA/90-155     |
| 199 | Other_O_F2UI00_SALS5/434-500       | 594 | Metazoa_G3Q1P5_GASAC/46-111    |
| 200 | Metazoa_E4KK2_OIKDI/81-144         | 595 | Metazoa_H3APK8_LATCH/117-182   |
| 201 | plant_C0L7E4_ANNCH/246-311         | 596 | Metazoa_D3TLB6_GLOMM/91-156    |
| 202 | Metazoa_G4VL68_SCHMA/20-85         | 597 | Metazoa_F1NNR3_CHICK/252-317   |
| 203 | Metazoa_H0ZQC9_TAEGU/20-85         | 598 | Metazoa_G1KLU8_ANOCA/272-337   |
| 204 | Metazoa_G7Y5I1_CLOSI/626-692       | 599 | plant_A5AIA0_VITVI/17-82       |
| 205 | Metazoa_G1MRM3_MELGA/443-483       | 600 | bacteria_Mst_442322805.1       |
| 206 | Metazoa_B5RI22_SALSA/362-427       | 601 | plant_Q1RUA5_MEDTR/173-238     |
| 207 | Metazoa_C1BKB4_OSMMO/192-258       | 602 | Metazoa_C1C3N0_LITCT/117-182   |
| 208 | Metazoa_C1BZ57_ESOLU/22-87         | 603 | fungi_B2VUR2_PYRTR/165-230     |
| 209 | plant_C1E164_MICSR/592-654         | 604 | plant_B6SW41_MAIZE/26-60       |
| 210 | Metazoa_F6ZVA4_ORNAN/1-32          | 605 | plant_ESGCK5_CUCME/51-116      |
| 211 | Metazoa_AN13_CANFA/249-314         | 607 | Metazoa_A8WG37_DANRE/170-236   |
| 212 | Metazoa_I1G0P6_AMPQE/238-303       | 609 | Metazoa_H3IAM2_STRPU/18-83     |
| 213 | plant_D7MT72_ARALL/15-80           | 610 | Metazoa_Q6QAZ9_CHICK/272-337   |
| 214 | Metazoa_B2L3Y5_ENBO/1-36           | 611 | plant_B9ISV5_POPTR/17-64       |
| 215 | plant_G7LF83_MEDTR/87-152          | 612 | fungi_C7YGO_NECH7/373-440      |
| 216 | Metazoa_G1PG64_MYOLU/117-182       | 613 | Metazoa_G5ATS2_HETGA/148-214   |
| 217 | plant_A9RBN7_PHYPA/14-79           | 614 | plant_D3B4Z8_POLPA/387-454     |

|     |                                    |     |                                    |
|-----|------------------------------------|-----|------------------------------------|
| 218 | fungi_C5GDZ2_AJEDR/316-380         | 615 | Metazoa_B3GQS3_9PLAT/285-350       |
| 219 | Metazoa_COH815_SALSA/17-82         | 616 | Metazoa_A5LHA3_LITCT/39-104        |
| 220 | Metazoa_F6WFFY8_ORNAN/437-502      | 617 | fungi_F2T3D2_AJEDA/230-295         |
| 221 | plant_I1IQN4_BRADI/167-234         | 618 | plant_D7M4J0_ARALL/14-79           |
| 222 | Other_O_A9VD41_MONBE/1-64          | 619 | plant_C5YL20_SORBI/87-152          |
| 224 | Metazoa_H2M2M0_ORYLA/108-173       | 620 | Other_O_E9C3C5_CAPO3/901-966       |
| 226 | plant_I1HFK2_BRADI/15-80           | 621 | Metazoa_C1C3N0_LITCT/276-341       |
| 227 | fungi_G0SAF7_CHATD/405-453         | 622 | fungi_Q0CY55_ASPTN/218-280         |
| 228 | Metazoa_E9J326_SOLIN/370-436       | 623 | Metazoa_D1M7K2 ICTPU/91-156        |
| 229 | Metazoa_Q8WPH0_BOMMO/417-482       | 624 | Other_O_A9V2E0_MONBE/624-688       |
| 230 | fungi_A2QCY7_ASPNC/380-447         | 625 | Metazoa_B2L46_ENBO/1-51            |
| 231 | Metazoa_ANB9_DROME/256-321         | 626 | fungi_F2Q3M6_TRIEC/228-291         |
| 232 | Metazoa_F6Y46_MONDO/599-664        | 627 | Metazoa_C1BIH9_OSMMO/17-82         |
| 233 | Metazoa_G3Q341_GASAC/89-154        | 628 | fungi_D5G497_TUBMM/224-289         |
| 234 | Metazoa_H0UWN6_CAVPO/45-110        | 629 | Metazoa_H9HRA6_ATTCE/256-321       |
| 235 | Metazoa_B3P220_DROER/97-162        | 630 | plant_Q9ZRU7_CAPAN/87-152          |
| 236 | Metazoa_D6WZQ0_TRICA/186-252       | 631 | fungi_D5G497_TUBMM/152-217         |
| 237 | Metazoa_F7EBA7_ENTR/380-445        | 632 | Metazoa_E9GSS2_DAPPU/265-330       |
| 238 | fungi_G0RVR1_HYPJQ/209-273         | 633 | Metazoa_D6WZQ5_TRICA/248-313       |
| 239 | fungi_G2R268_THITE/416-483         | 634 | Amoebozoa_F4PN43_DICFS/385-452     |
| 240 | plant_F2D6P4_HORVD/36-101          | 635 | fungi_E3RN47_PYRRT/650-687         |
| 241 | plant_F2E2N7_HORVD/143-209         | 636 | Metazoa_F1L8I2_ASCSU/123-188       |
| 242 | fungi_B8M4F7_TALSN/637-704         | 637 | Stramenopiles_D0P3M8_PHYIT/154-220 |
| 243 | plant_B9N394_POPTR/170-236         | 638 | Metazoa_E3TFU8 ICTPU/36-101        |
| 244 | Metazoa_D3TME1_GLOMM/91-156        | 639 | plant_B8BCI7_ORYSI/246-312         |
| 245 | Metazoa_C3ZND3_BRAFL/71-137        | 640 | bacteria_SI_284035615.20           |
| 246 | Metazoa_F1P2N4_CHICK/93-158        | 641 | Metazoa_G3WWE4_SARHA/20-85         |
| 247 | Ecavates_GIA1_GIAIN/5-69           | 642 | Metazoa_H2ZUH7_LATCH/94-159        |
| 248 | fungi_G2WWB5_VERDV/637-706         | 643 | Metazoa_B3S9E5_TRIAD/1-57          |
| 249 | fungi_G3JNQ8_CORMM/214-279         | 644 | Metazoa_F6WVJ1_ORNAN/20-84         |
| 250 | plant_G7LEK9_MEDTR/51-118          | 645 | Metazoa_Q4VSV4_MONAL/268-333       |
| 251 | plant_D8RJM2_SELML/28-66           | 646 | Metazoa_E1GJQ8_LOALO/95-160        |
| 252 | fungi_E9DZQ0_METAQ/291-363         | 647 | Stramenopiles_B5Y5D2_PHATC/27-92   |
| 253 | plant_B9SIA1_RICCO/85-151          | 649 | plant_Q9FUG5_CERRI/170-235         |
| 254 | plant_A9TFB3_PHYPA/14-79           | 650 | Other_O_A9V4C6_MONBE/179-245       |
| 255 | Metazoa_O57570_DANRE/112-177       | 651 | Metazoa_E9H187_DAPPU/26-91         |
| 256 | plant_B8AS2_ORYSI/94-145           | 652 | Metazoa_E2RQ29_CANFA/201-268       |
| 257 | Metazoa_ANA5_CHICK/19-84           | 653 | Stramenopiles_G5A7E6_PHYSP/26-91   |
| 258 | plant_B9SM17_RICCO/86-151          | 654 | Metazoa_G3QPT3_GORGO/277-342       |
| 259 | Metazoa_H2TYU9_TAKRU/268-333       | 655 | Metazoa_F1LOA1_ASCSU/347-413       |
| 260 | Other_O_E9C3C5_CAPO3/829-894       | 656 | Metazoa_Q4SM21_TETNG/267-332       |
| 261 | plant_G7IW11_MEDTR/86-151          | 658 | fungi_E9DZQ0_METAQ/374-441         |
| 262 | plant_Q24132_TOBAC/87-152          | 659 | Metazoa_F1LOA1_ASCSU/192-257       |
| 263 | Other_O_E9CFN1_CAPO3/387-453       | 660 | fungi_B6GYL8_PENCW/398-465         |
| 264 | Metazoa_F1L0T9_ASCSU/20-85         | 661 | plant_B8BF46_ORYSI/280-345         |
| 265 | Stramenopiles_D0NJ67_PHYIT/259-323 | 662 | fungi_G0SAF7_CHATD/227-295         |
| 266 | plant_A6NOR1_ORYSI/37-102          | 663 | plant_C7EQ1_ORYSI/2-50             |
| 267 | fungi_E7A392_SPORE/283-348         | 664 | fungi_G3JNQ8_CORMM/373-441         |
| 268 | Metazoa_C1K7M5 ICTPU/336-402       | 665 | fungi_Q2UFJ4_ASPOR/312-376         |
| 270 | Metazoa_G7PF12_MACFA/421-486       | 667 | Metazoa_F6IA10_DANRE/515-581       |
| 271 | Metazoa_B0WWMU9_CULQU/252-317      | 668 | Metazoa_G1KLU8_ANOCA/41-106        |
| 272 | Metazoa_F1SS97_PIG/48-113          | 669 | Metazoa_G3USL9_MELGA/50-90         |
| 273 | Metazoa_E9H188_DAPPU/266-331       | 670 | Metazoa_G1KFA2_ANOCA/172-238       |
| 274 | Metazoa_H2M051_ORYLA/90-155        | 671 | Metazoa_F1L2C7_ASCSU/175-241       |
| 275 | bacteria_Cc_380728269.21           | 672 | Metazoa_F6WFFY8_ORNAN/365-430      |
| 276 | Metazoa_B511_SALSA/18-83           | 673 | plant_A9NNL2_PICSI/170-234         |
| 277 | Metazoa_A0SZ5_PERPL/1-29           | 674 | plant_B9ISV5_POPTR/86-152          |
| 278 | fungi_A1C7G9_ASPCL/298-364         | 676 | Metazoa_Q9GNG6_BOMMO/256-321       |
| 279 | Metazoa_D3TME1_GLOMM/250-315       | 677 | Metazoa_D3TM26_GLOMM/250-315       |
| 280 | Metazoa_E1JJR8_DROME/91-156        | 678 | plant_I1HJW7_BRADI/104-153         |
| 281 | plant_AND3_ARATH/15-80             | 679 | plant_Q22341_9ROSI/15-80           |
| 282 | Metazoa_C3ZND5_BRAFL/6-39          | 680 | Metazoa_G3ISL3_CRIGR/201-267       |
| 283 | Metazoa_Q56J74_ONCTS/39-103        | 681 | Metazoa_G7Y5I1_CLOSI/542-608       |
| 284 | Metazoa_F6TS8_MONDO/91-156         | 682 | Metazoa_H3BDR7_LATCH/108-174       |
| 285 | fungi_Q6C9U3_YARLI/144-209         | 683 | Metazoa_A7RW3_NEMVE/88-153         |
| 286 | Metazoa_F6V1V9_ORNAN/257-322       | 684 | Metazoa_H3BGL6_LATCH/437-502       |
| 287 | Metazoa_HOLG9_OTOGA/267-332        | 685 | plant_D7KVS1_ARALL/87-152          |
| 288 | plant_C6TD05_SOYBN/171-219         | 686 | Metazoa_H2TGM1_TAKRU/173-239       |

|     |                                  |     |                                    |
|-----|----------------------------------|-----|------------------------------------|
| 289 | fungi_Q2UFJ4_ASPOR/154-219       | 687 | plant_B7FY0_MEDTR/14-79            |
| 290 | bacteria_Fb_363580181.14         | 688 | Metazoa_F7H9W2_CALJA/119-179       |
| 291 | plant_Q6S9D8_WHEAT/170-236       | 689 | plant_F2DV98_HORVD/256-321         |
| 292 | Stramenopiles_G4Z1N8_PHYSP/27-92 | 690 | Metazoa_A5LHA5_LITCT/174-240       |
| 293 | fungi_A8N3U4_COPC7/271-335       | 691 | Metazoa_B3RPM7_TRIAD/90-155        |
| 294 | plant_F2DIL8_HORVD/207-272       | 692 | plant_D7T2Q7_VITVI/15-80           |
| 295 | Metazoa_D6WZQ1_TRICA/316-370     | 694 | Metazoa_E9H189_DAPPU/188-256       |
| 296 | human_AA2L_HUMAN/37-102          | 695 | Stramenopiles_F0WGW1_9STRA/185-251 |
| 297 | Metazoa_H3IAM2_STRPU/175-241     | 697 | plant_A5BTZ8_VITVI/238-303         |
| 298 | Metazoa_F6ZL59_CALJA/433-495     | 698 | Metazoa_G1N762_MELGA/62-118        |
| 299 | Metazoa_G3NNR3_GASAC/90-155      | 699 | plant_P93157_GOSHI/86-151          |
| 300 | fungi_Q4P8I3_USTMA/196-261       | 700 | Metazoa_E2BIN4_HARSA/25-90         |
| 301 | Metazoa_Q6P603_DANRE/267-332     | 701 | Metazoa_A87I3_CAEBR/266-331        |
| 302 | plant_G7IW12_MEDTR/115-180       | 702 | fungi_C7YGO_NECH7/213-278          |
| 303 | Metazoa_H2LS05_ORYLA/17-82       | 703 | Metazoa_Q4ZGZ6_TAESO/243-308       |
| 304 | Metazoa_H3ETP9_PRIPA/172-238     | 704 | fungi_F974_MYCGM/144-209           |
| 305 | Metazoa_D3PI40_9MAI/267-331      | 705 | Metazoa_E0V9K1_PEDHC/207-272       |
| 306 | plants_D7FJE4_ECTSI/607-672      | 706 | Metazoa_A8E7L2_DANRE/1-38          |
| 307 | Metazoa_F8RBD9_SPIER/104-176     | 707 | plant_F2D6P4_HORVD/197-261         |
| 308 | bacteria_Cc_380729140.22         | 708 | bacteria_Ms_409197576.31           |
| 309 | Metazoa_C0H815_SALSA/89-154      | 709 | plant_A9RZN4_PHYPA/199-264         |
| 310 | Metazoa_H9GG64_ANOCA/318-384     | 710 | Metazoa_Q6QAZ9_CHICK/196-262       |
| 311 | Metazoa_A8SY2_CAEBR/170-235      | 711 | fungi_Q0V6M8_PHANO/436-488         |
| 312 | Stramenopiles_DONJ65_PHYIT/27-92 | 712 | plants_D8LG01_ECTSI/11-77          |
| 313 | plant_F6KLI6_ARAHY/14-79         | 713 | plant_ESGCK3_CUCME/401-466         |
| 314 | fungi_H1VE74_COLHI/160-225       | 714 | Ecavates_ANE1_GIAIN/21-78          |
| 315 | Metazoa_H2S105_TAKRU/118-183     | 715 | Metazoa_G1SNT8_RABIT/24-89         |
| 316 | Metazoa_F6QS6_MACMU/263-328      | 716 | plant_B4FZ06_MAIZE/64-129          |
| 317 | fungi_I1RBQ2_GIBZE/380-447       | 717 | Metazoa_A7RW3_NEMVE/172-238        |
| 318 | Metazoa_Q8ITJ0_HETGL/107-171     | 718 | fungi_Q6PKY9_ASPFM/313-379         |
| 319 | Metazoa_Q5F321_MANSE/256-321     | 719 | Metazoa_C0H996_SALSA/250-315       |
| 320 | Metazoa_F6YMO_MONDO/201-264      | 720 | Metazoa_G7PCS1_MACFA/125-191       |
| 321 | Metazoa_E3TDF3_9TELE/246-311     | 721 | Metazoa_G3ST95_LOAF/93-158         |
| 322 | Metazoa_H2KP47_CLOSI/344-409     | 722 | Other_O_A9VC1_MONBE/442-508        |
| 323 | Metazoa_H2PD2_CIOIN/60-125       | 723 | fungi_G9NI54_HYPAL/146-213         |
| 324 | Metazoa_B5CE7_SALSA/92-157       | 724 | Metazoa_F6TU75_MONDO/15-80         |
| 325 | Metazoa_G1KFA2_ANOCA/17-82       | 725 | Metazoa_H2PD2_CIOIN/142-208        |
| 326 | Metazoa_ANA9_MOUSE/205-264       | 726 | Metazoa_G1NVK9_MYOLU/58-123        |
| 327 | Metazoa_F1LDR9_ASCSU/99-164      | 727 | Metazoa_H9H3J1_MACMU/108-171       |
| 328 | Metazoa_H3IAM2_STRPU/90-157      | 728 | plant_B3TLL7_ELAGV/246-311         |
| 329 | Metazoa_Q9NGU7_TAESO/201-267     | 729 | Metazoa_Q7ZM2_ENLA/270-335         |
| 330 | bacteria_Cc_380729140.2          | 730 | Metazoa_F5HJB2_ANOGA/97-162        |
| 331 | bacteria_Cc_380728269.3          | 731 | plant_Q4ABP7_BRARP/87-152          |
| 332 | bacteria_Bb_375105645.4          | 732 | Metazoa_G3MPT6_9ACAR/336-401       |
| 333 | Metazoa_G1NJ32_MELGA/181-247     | 733 | fungi_G9N6Y4_HYPVG/309-374         |
| 334 | bacteria_Ho_262194969.5          | 734 | plant_B9SM17_RICCO/14-79           |
| 335 | bacteria_Ho_262194969.6          | 735 | Metazoa_G3PWL0_GASAC/182-248       |
| 336 | Metazoa_E1FYF7_LOALO/22-87       | 736 | Metazoa_F6IA10_DANRE/433-498       |
| 337 | plant_B9ISV5_POPTR/170-238       | 737 | Metazoa_H2RYZ8_TAKRU/109-174       |
| 339 | Metazoa_A1L514_BOVIN/90-132      | 738 | Metazoa_Q641H0_ENLA/273-338        |
| 340 | Metazoa_F6ZAK1_HORSE/22-87       | 739 | Metazoa_E1ZYA7_CAMFO/256-319       |
| 341 | Metazoa_Q17A53_AEDAE/93-158      | 740 | Metazoa_B5BM7_SALSA/268-333        |
| 342 | Metazoa_A5LHA6_LITCT/20-85       | 741 | Metazoa_F1LOT9_ASCSU/92-157        |
| 343 | Metazoa_G1KJG0_ANOCA/86-151      | 742 | Metazoa_C3ZQF7_BRAFL/237-303       |
| 344 | Metazoa_C3ZND4_BRAFL/177-219     | 743 | Metazoa_D3Z0S1_MOUSE/75-133        |
| 345 | Metazoa_G0MLG0_CAEBE/281-346     | 744 | Metazoa_E1FYF7_LOALO/177-243       |
| 346 | Amoebozoa_ANA7_DICDI/165-230     | 745 | plant_A5B79_VITVI/250-316          |
| 347 | Metazoa_H0ZCD8_TAEGU/257-322     | 747 | fungi_E4URJ3_ARTGP/312-378         |
| 348 | Metazoa_Q9ZL9_TAESO/278-343      | 748 | plant_A9SP21_PHYPA/14-79           |
| 349 | plant_D2D2Z9_GOSHI/244-309       | 749 | bacteria_Mm_124003075.8            |
| 350 | Metazoa_D3TRS6_GLOMM/180-246     | 750 | Ecavates_Q8ITF7_GIAIN/154-220      |
| 351 | Metazoa_A2BFV8_DANRE/113-178     | 751 | Metazoa_H6BD08_OSTED/70-136        |
| 352 | Metazoa_Q4VSV4_MONAL/192-258     | 752 | Metazoa_G3STG5_LOAF/117-182        |
| 353 | Metazoa_Q804G8_DANRE/267-332     | 753 | plant_B9GWL9_POPTR/231-296         |
| 354 | plant_A5BQ4_VITVI/96-155         | 754 | Metazoa_E9H191_DAPPU/101-166       |
| 355 | plant_A5BQ4_VITVI/176-240        | 756 | Metazoa_B3GQS3_9PLAT/34-99         |
| 356 | fungi_Q5BC4_EMENI/269-334        | 757 | Other_O_F2TB8_SALSS/514-579        |
| 357 | Metazoa_B2L3Y2_ENBO/193-259      | 760 | Metazoa_D3TME1_GLOMM/175-240       |

|     |                                    |     |                                   |
|-----|------------------------------------|-----|-----------------------------------|
| 358 | Metazoa_Q6DI3_ENTR/38-103          | 761 | Metazoa_E9H189_DAPPU/28-93        |
| 359 | fungi_B6Q7Z7_PENMQ/376-443         | 762 | plant_B9SNI5_RICCO/84-149         |
| 360 | plant_Q24132_TOBAC/243-308         | 763 | plant_E5GCK3_CUCME/329-394        |
| 361 | plant_Q42922_MEDSA/163-232         | 764 | bacteria_Cc_380728269.10          |
| 362 | plant_C6TFT8_SOYBN/15-80           | 765 | Metazoa_ANA8_RAT/257-322          |
| 363 | fungi_COND81_AJECG/253-317         | 766 | fungi_E9QB9_ASPFU/229-294         |
| 364 | Metazoa_B7QC21_IOSC/1-57           | 767 | Metazoa_C1C3Z2_LITCT/177-243      |
| 365 | Metazoa_F1P6B7_CANFA/201-267       | 768 | Metazoa_G6D7C8_DANPL/331-397      |
| 366 | Metazoa_B4L73_DROMO/251-316        | 769 | Metazoa_A5LHA5_LITCT/19-84        |
| 367 | Metazoa_Q70KQ6_CIOIN/504-569       | 770 | Stramenopiles_F00L8_9STRA/185-251 |
| 368 | Metazoa_Q8MJBS_RABIT/214-280       | 771 | Metazoa_F6YNZ9_MACMU/18-83        |
| 369 | Metazoa_A0F047_PSEM/38-104         | 772 | plant_B9RGDO_RICCO/174-239        |
| 370 | Metazoa_E9H189_DAPPU/100-165       | 773 | Metazoa_H2PH43_PONAB/231-297      |
| 371 | plant_Q69DC2_GOSHI/87-152          | 774 | Metazoa_D3ZHD1_RAT/21-86          |
| 372 | plant_G7LF84_MEDTR/14-79           | 775 | plant_I1P4D4_ORYGL/15-80          |
| 373 | fungi_A8N3U1_COPC7/203-257         | 778 | fungi_A2QC77_ASPNC/304-370        |
| 374 | plant_Q69DC2_GOSHI/170-235         | 779 | plants_D8LG01_ECTSI/514-579       |
| 375 | plant_B9RJJ1_RICCO/245-310         | 780 | plant_D7M4J0_ARALL/244-309        |
| 376 | Metazoa_F6YG66_CIOIN/323-388       | 781 | Metazoa_AN10_MOUSE/93-158         |
| 377 | plant_D7SPZ0_VITVI/13-77           | 782 | Metazoa_G7MDI7_MACMU/201-264      |
| 378 | Stramenopiles_G4Z1N4_PHYSP/128-176 | 783 | fungi_G3JNQ8_CORMM/142-207        |
| 379 | Metazoa_Q6DKC4_ENLA/38-103         | 784 | plant_G7LE90_MEDTR/15-80          |
| 380 | Other_O_A9VC1_MONBE/824-889        | 785 | fungi_E9D857_COCP/373-440         |
| 381 | plant_I1MIU3_SOYBN/87-152          | 786 | plant_D7KL8_ARALL/246-311         |
| 382 | Metazoa_B4JK98_DROGR/91-156        | 787 | Metazoa_A4QNM7_ENTR/175-241       |
| 384 | Stramenopiles_H3HB96_PHYRM/98-163  | 788 | Metazoa_G5AJY3_HETGA/269-334      |
| 385 | Metazoa_A7RW2_NEMVE/74-131         | 789 | fungi_G2WZN6_VERDV/196-264        |
| 386 | plant_C5YL20_SORBI/15-80           | 790 | bacteria_Fb_363580180.12          |
| 387 | Amoebozoa_F0ZZ7_DICPU/182-247      | 791 | bacteria_Ka_163756662.13          |
| 388 | Amoebozoa_F1A6F3_DICPU/84-146      | 792 | Metazoa_G6D9T5_DANPL/93-158       |
| 389 | Metazoa_ANA5_CYNPY/93-158          | 793 | Metazoa_E9GPJ9_DAPPU/164-229      |
| 390 | Metazoa_G1MU27_MELGA/92-157        | 794 | bacteria_Aa_402495857.16          |
| 391 | plant_D7U8J8_VITVI/163-230         | 795 | bacteria_Ch_110637878.17          |
| 392 | Metazoa_G3NNS5_GASAC/178-244       | 796 | bacteria_Fi_441497853.18          |
| 393 | Metazoa_F6YYM0_MONDO/117-182       | 797 | Metazoa_G3PZS3_GASAC/179-245      |
| 394 | Ecavates_C6LSD2_GIAIB/79-134       | 798 | Stramenopiles_DONJ67_PHYIT/97-163 |
| 395 | Stramenopiles_DONJ65_PHYIT/260-324 | 799 | bacteria_Ka_163756728.15          |
| 396 | Metazoa_A5LHA3_LITCT/194-260       | 800 | Metazoa_F6TF12_MONDO/400-465      |
| 398 | plant_D3BHS8_POLPA/253-317         | 801 | bacteria_Bb_375105645.23          |
| 399 | Metazoa_D6WZQ2_TRICA/319-385       | 802 | bacteria_Cc_380729140.24          |
| 400 | plant_I1M0U7_SOYBN/86-151          | 803 | bacteria_Ri_384102706.25          |
|     |                                    | 804 | bacteria_Bb_375105645.26          |
|     |                                    | 805 | bacteria_Ga_226228830.27          |
|     |                                    | 806 | bacteria_Ga_226228830.28          |
|     |                                    | 808 | Other_O_F2UBS2_SALS5/236-301      |
|     |                                    | 809 | bacteria_Cc_380728269.29          |
|     |                                    | 810 | Metazoa_F7IN55_CALJA/97-139       |
|     |                                    | 812 | Metazoa_A7RW1_NEMVE/76-142        |
|     |                                    | 813 | Other_O_F2UJT2_SALS5/505-570      |
|     |                                    | 814 | Metazoa_F1MU06_BOVIN/201-264      |
|     |                                    | 815 | bacteria_Ri_384102706.32          |
|     |                                    | 816 | bacteria_Nm_258651831.33          |
|     |                                    | 817 | Metazoa_H3JCA7_STRPU/33-87        |
